# Supplementary material
Source: publisher figshare collection journal article supplement (https://frontiersin.figshare.com/ndownloader/files/23012312)
Supplement: Supplementary file [file 23012312]

# Telmisartan and rosuvastatin synergistically ameliorating dementia and cognitive impairment in older hypertensive patients with apolipoprotein E genotype

Wenjing Hu,<sup>1,#</sup> Ying Li,<sup>2,#</sup> Yingxin Zhao,<sup>1</sup> Yuanli Dong,<sup>3</sup> Yi Cui,<sup>4</sup> Shangwen Sun,<sup>1</sup> Gary Gong,<sup>5</sup> Hua Zhang,<sup>1</sup> Qiang Chai,<sup>1</sup> Juan Wang,<sup>6\*</sup> Zhendong Liu,<sup>1,\*</sup>

**Supplementary Table 1 The risks of the incidence of dementia**

|                                                         | HR    | 95 % CI         | P value |
|---------------------------------------------------------|-------|-----------------|---------|
| Grouped by telmisartan and rosuvastatin                 |       |                 |         |
| Combination group                                       | Ref.  |                 |         |
| Rosuvastatin group                                      | 1.904 | 1.137 to 3.188  | 0.014   |
| Telmisartan group                                       | 2.064 | 1.241 to 3.433  | 0.005   |
| Control group                                           | 3.835 | 2.835 to 6.137  | <0.001  |
| Grouped by telmisartan and APOE genotype                |       |                 |         |
| Telmisartan(+)* $\epsilon 4$ (-) group                  | Ref.  |                 |         |
| Telmisartan(+)* $\epsilon 4$ (+) group                  | 1.339 | 0.785 to 2.286  | 0.284   |
| Telmisartan(-)* $\epsilon 4$ (-) group                  | 1.838 | 1.273 to 2.654  | 0.001   |
| Telmisartan(-)* $\epsilon 4$ (+) group                  | 2.617 | 1.691 to 4.050  | <0.001  |
| Grouped by rosuvastatin and APOE genotype               |       |                 |         |
| Rosuvastatin(+)* $\epsilon 4$ (-) group                 | Ref.  |                 |         |
| Rosuvastatin(+)* $\epsilon 4$ (+) group                 | 1.276 | 0.737 to 2.208  | 0.384   |
| Rosuvastatin(-)* $\epsilon 4$ (-) group                 | 1.948 | 1.345 to 2.822  | <0.001  |
| Rosuvastatin(-)* $\epsilon 4$ (+) group                 | 2.895 | 1.869 to 4.486  | <0.001  |
| Grouped by telmisartan, rosuvastatin, and APOE genotype |       |                 |         |
| Combination* $\epsilon 4$ (-) group                     | Ref.  |                 |         |
| Combination* $\epsilon 4$ (+) group                     | 1.461 | 0.601 to 3.552  | 0.403   |
| Rosuvastatin* $\epsilon 4$ (-) group                    | 2.035 | 1.101 to 3.762  | 0.023   |
| Rosuvastatin* $\epsilon 4$ (+) group                    | 2.319 | 1.076 to 4.999  | 0.032   |
| Telmisartan* $\epsilon 4$ (-) group                     | 2.151 | 1.173 to 3.948  | 0.013   |
| Telmisartan* $\epsilon 4$ (+) group                     | 2.706 | 1.279 to 5.721  | 0.009   |
| Control* $\epsilon 4$ (-) group                         | 3.682 | 2.087 to 6.498  | <0.001  |
| Control* $\epsilon 4$ (+) group                         | 5.967 | 3.182 to 11.190 | <0.001  |

**Supplementary Figure legends:**

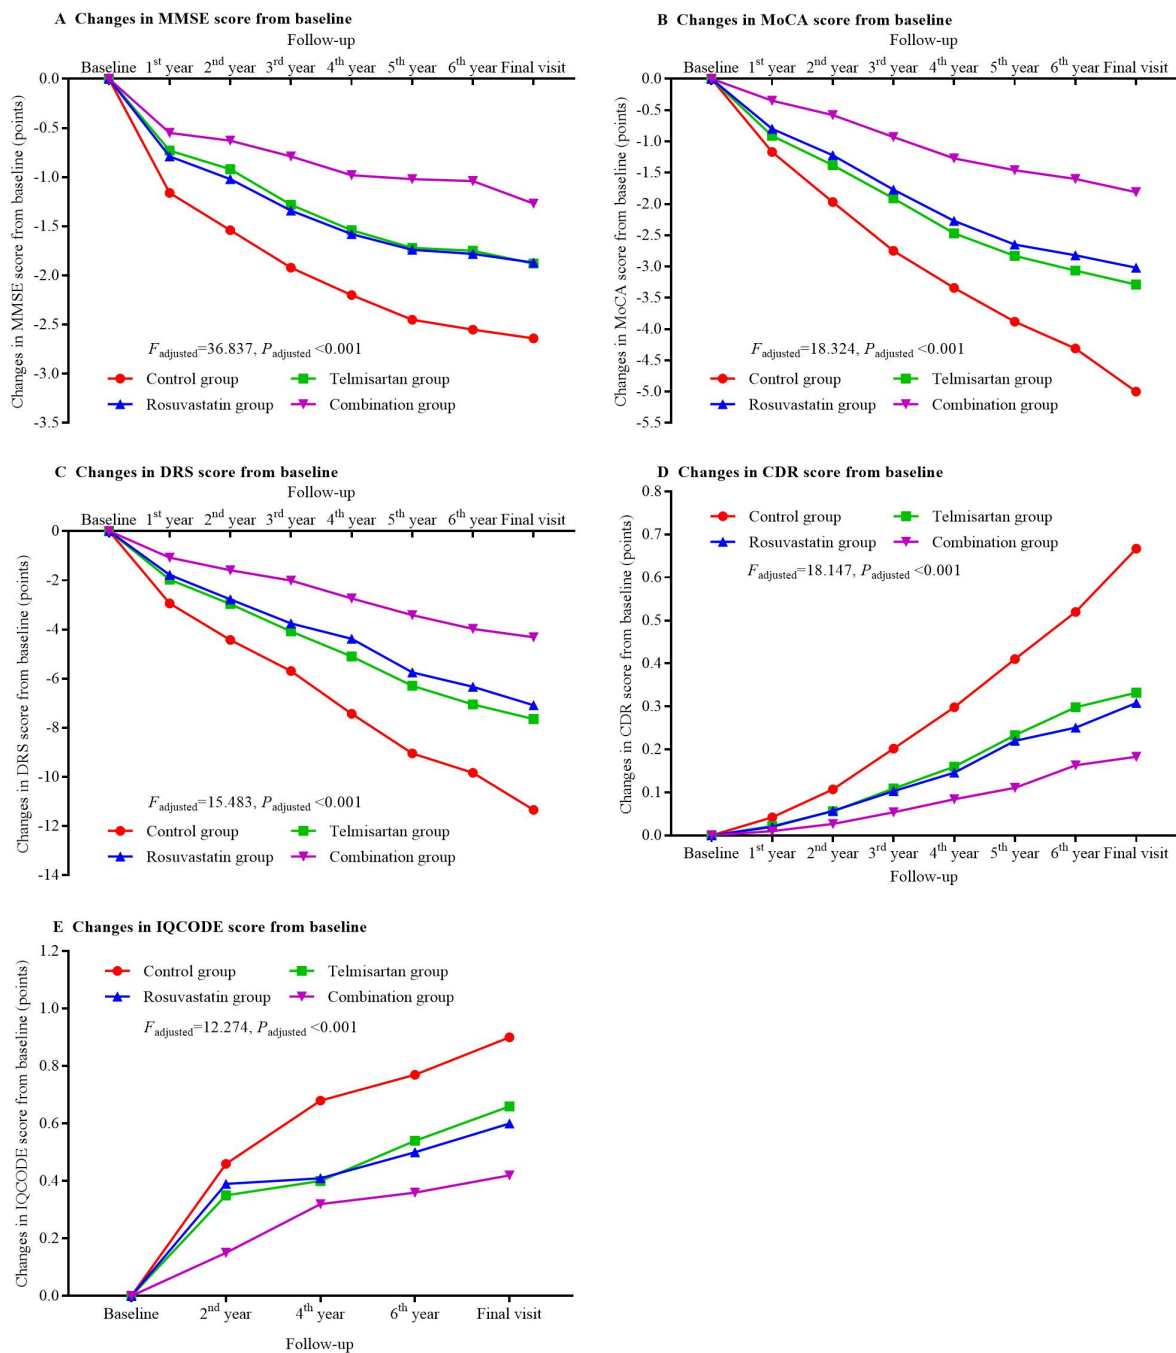

**Supplementary Fig. 1 Changes in global cognitive function and IQCODE from baseline at every follow-up visit in the patients grouped by telmisartan and rosuvastatin administration.** A is the changes in MMSE; B is the changes in MoCA; C is the changes in DRS; D is the changes in CDR; E is the changes in IQCODE. MMSE indicates Mini-Mental Scale Estimation; MoCA, Montreal Cognitive Assessment; DRS, Mattis Dementia Rating Scale; CDR, Clinical Dementia Rating; IQCODE, Informant Questionnaire on Cognitive Decline in the Elderly.

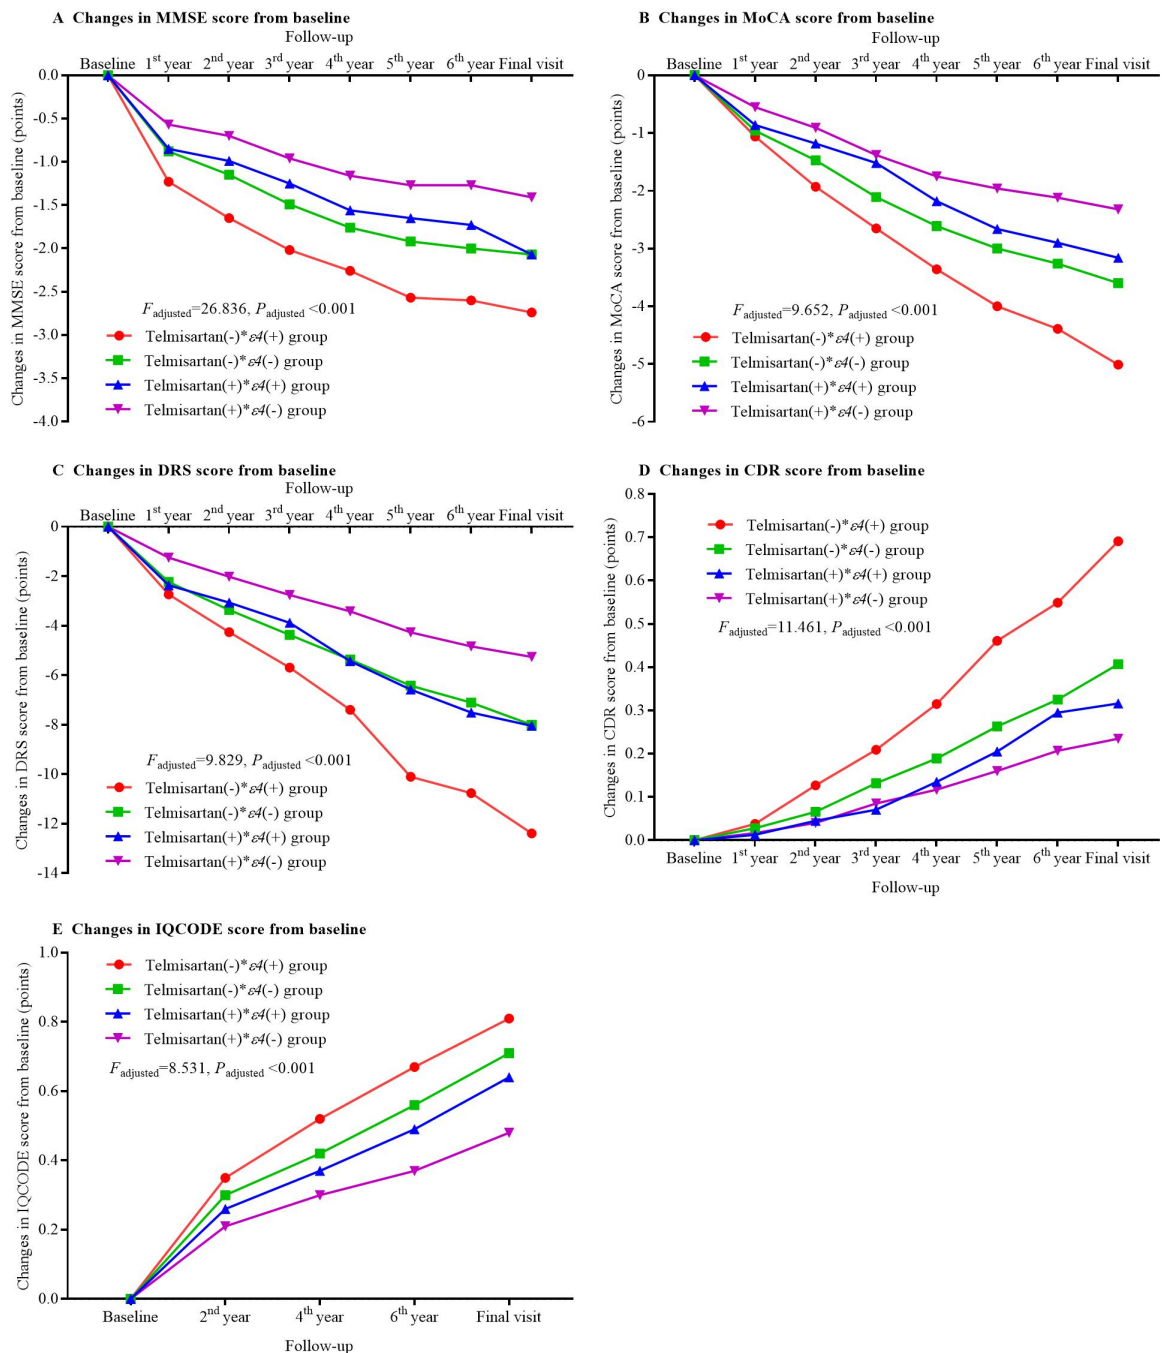

**Supplementary Fig. 2 Changes in global cognitive function and IQCODE from baseline at every follow-up visit in the patients grouped by telmisartan administration and *APOE* genotype.** A is the changes in MMSE; B is the changes in MoCA; C is the changes in DRS; D is the changes in CDR; E is the changes in IQCODE. MMSE indicates Mini-Mental Scale Estimation; MoCA, Montreal Cognitive Assessment; DRS, Mattis Dementia Rating Scale; CDR, Clinical Dementia Rating; IQCODE, Informant Questionnaire on Cognitive Decline in the Elderly.

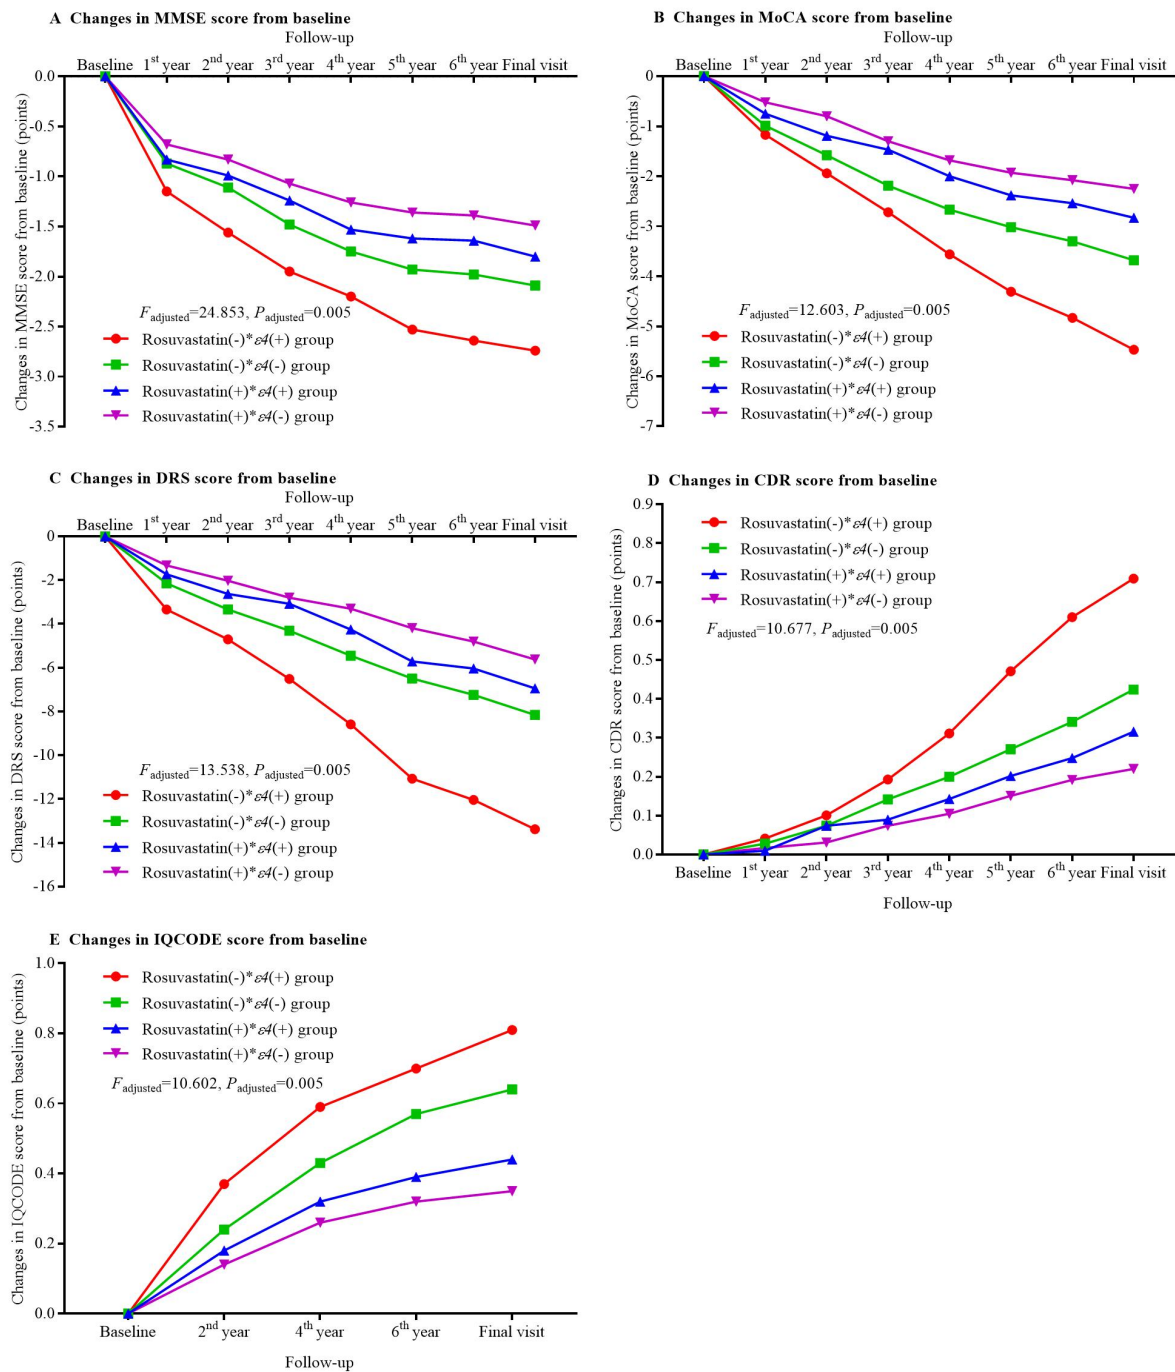

**Supplementary Fig. 3 Changes in global cognitive function and IQCODE from baseline at every follow-up visit in the patients grouped by rosuvastatin administration and *APOE* genotype.** A is the changes in MMSE; B is the changes in MoCA; C is the changes in DRS; D is the changes in CDR; E is the changes in IQCODE. MMSE indicates Mini-Mental Scale Estimation; MoCA, Montreal Cognitive Assessment; DRS, Mattis Dementia Rating Scale; CDR, Clinical Dementia Rating; IQCODE, Informant Questionnaire on Cognitive Decline in the Elderly.

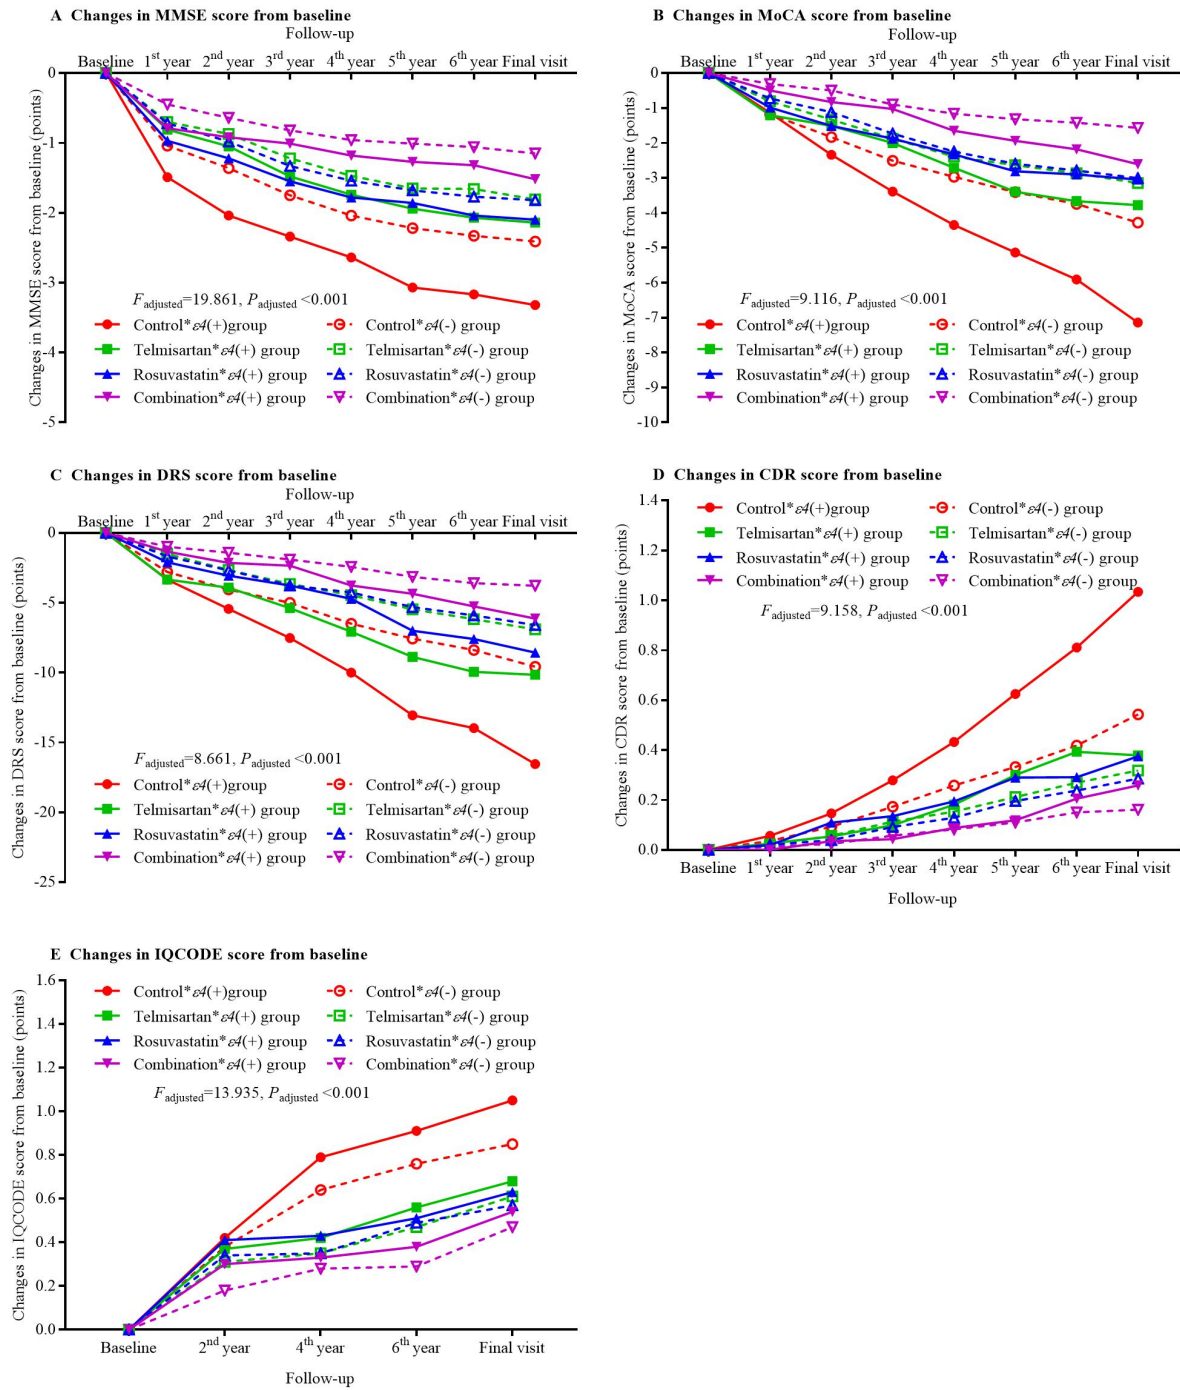

**Supplementary Fig. 4 Changes in global cognitive function and IQCODE from baseline at every follow-up visit in the patients grouped by telmisartan, rosuvastatin, and *APOE* genotype.** A is the changes in MMSE; B is the changes in MoCA; C is the changes in DRS; D is the changes in CDR; E is the changes in IQCODE. MMSE indicates Mini-Mental Scale Estimation; MoCA, Montreal Cognitive Assessment; DRS, Mattis Dementia Rating Scale; CDR, Clinical Dementia Rating; IQCODE, Informant Questionnaire on Cognitive Decline in the Elderly.



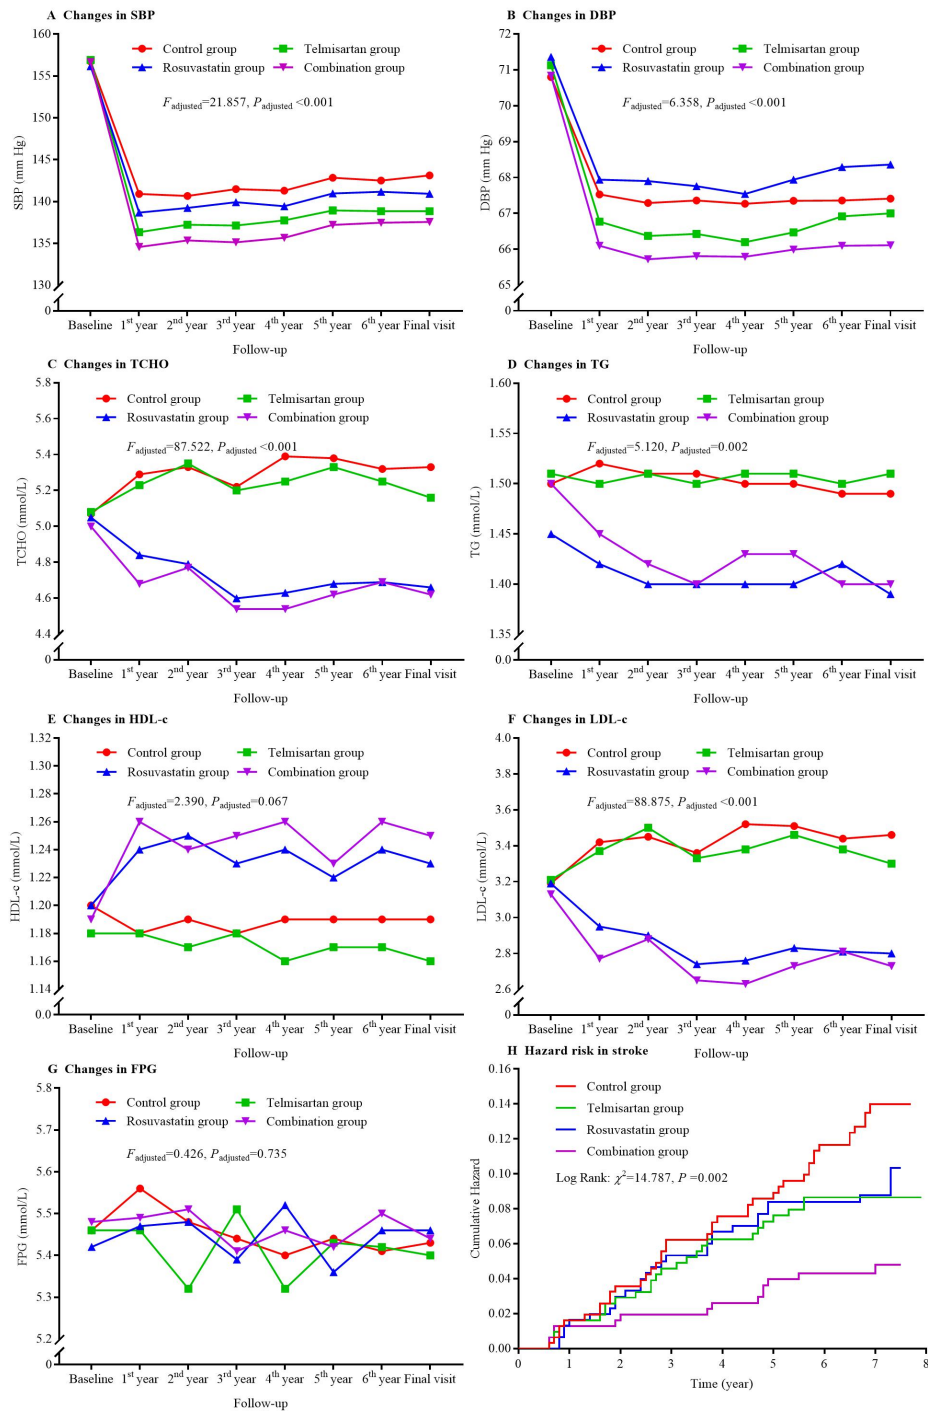

**Supplementary Fig. 5 Trajectory of blood pressure, lipids, and fasting plasma glucose and cumulative hazards of stroke incidence during the follow-up period in the patients grouped by telmisartan and rosuvastatin administration.** A is the trajectory of SBP; B is the trajectory of DBP; C is the trajectory of TCHO; D is the trajectory of TG; E is the trajectory of HDL-c; F is the trajectory of LDL-c; G is the trajectory of FPG; H is the cumulative hazard of stroke incidence. SBP indicates systolic blood pressure; DBP, diastolic blood pressure; TCHO, total cholesterol; TG, triglycerides; HDL-c, high-density lipoprotein cholesterol; LDL-c, low-density lipoprotein cholesterol; FPG, fasting plasma glucose.

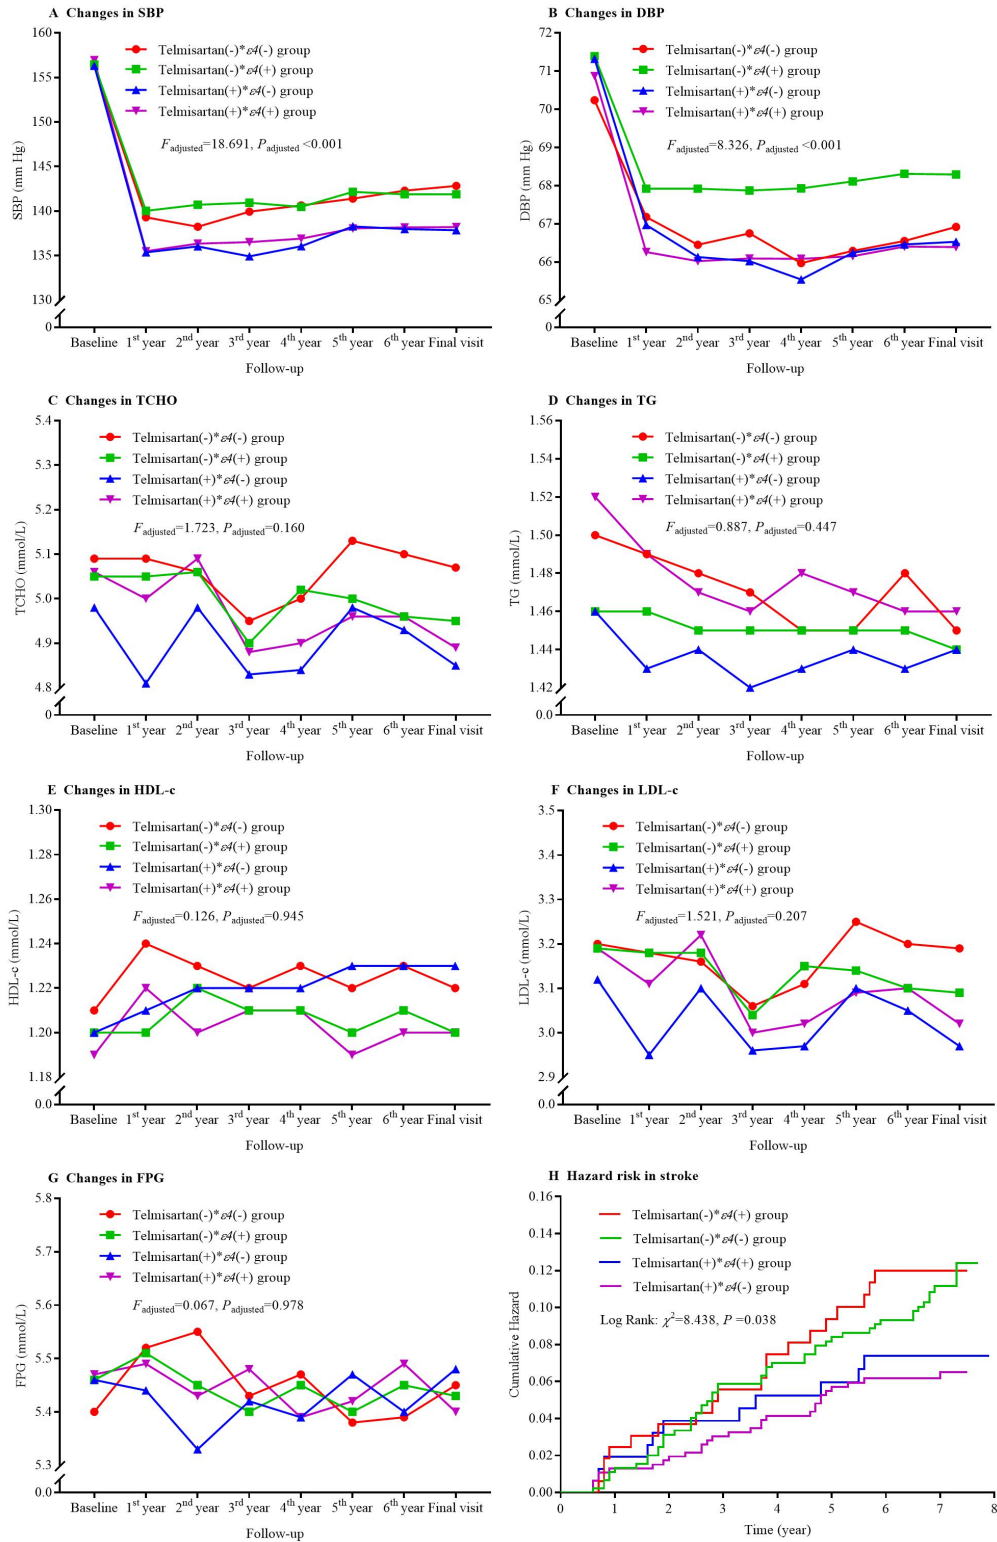

**Supplementary Fig. 6 Trajectory of blood pressure, lipids, and fasting plasma glucose and cumulative hazards of stroke incidence during the follow-up period in the patients grouped by telmisartan administration and *APOE* genotype.** A is the trajectory of SBP; B is the trajectory of DBP; C is the trajectory of TCHO; D is the trajectory of TG; E is the trajectory of HDL-c; F is the trajectory of LDL-c; G is the trajectory of FPG; H is the

cumulative hazard of stroke incidence. SBP indicates systolic blood pressure; DBP, diastolic blood pressure; TCHO, total cholesterol; TG, triglycerides; HDL-c, high-density lipoprotein cholesterol; LDL-c, low-density lipoprotein cholesterol; FPG, fasting plasma glucose.



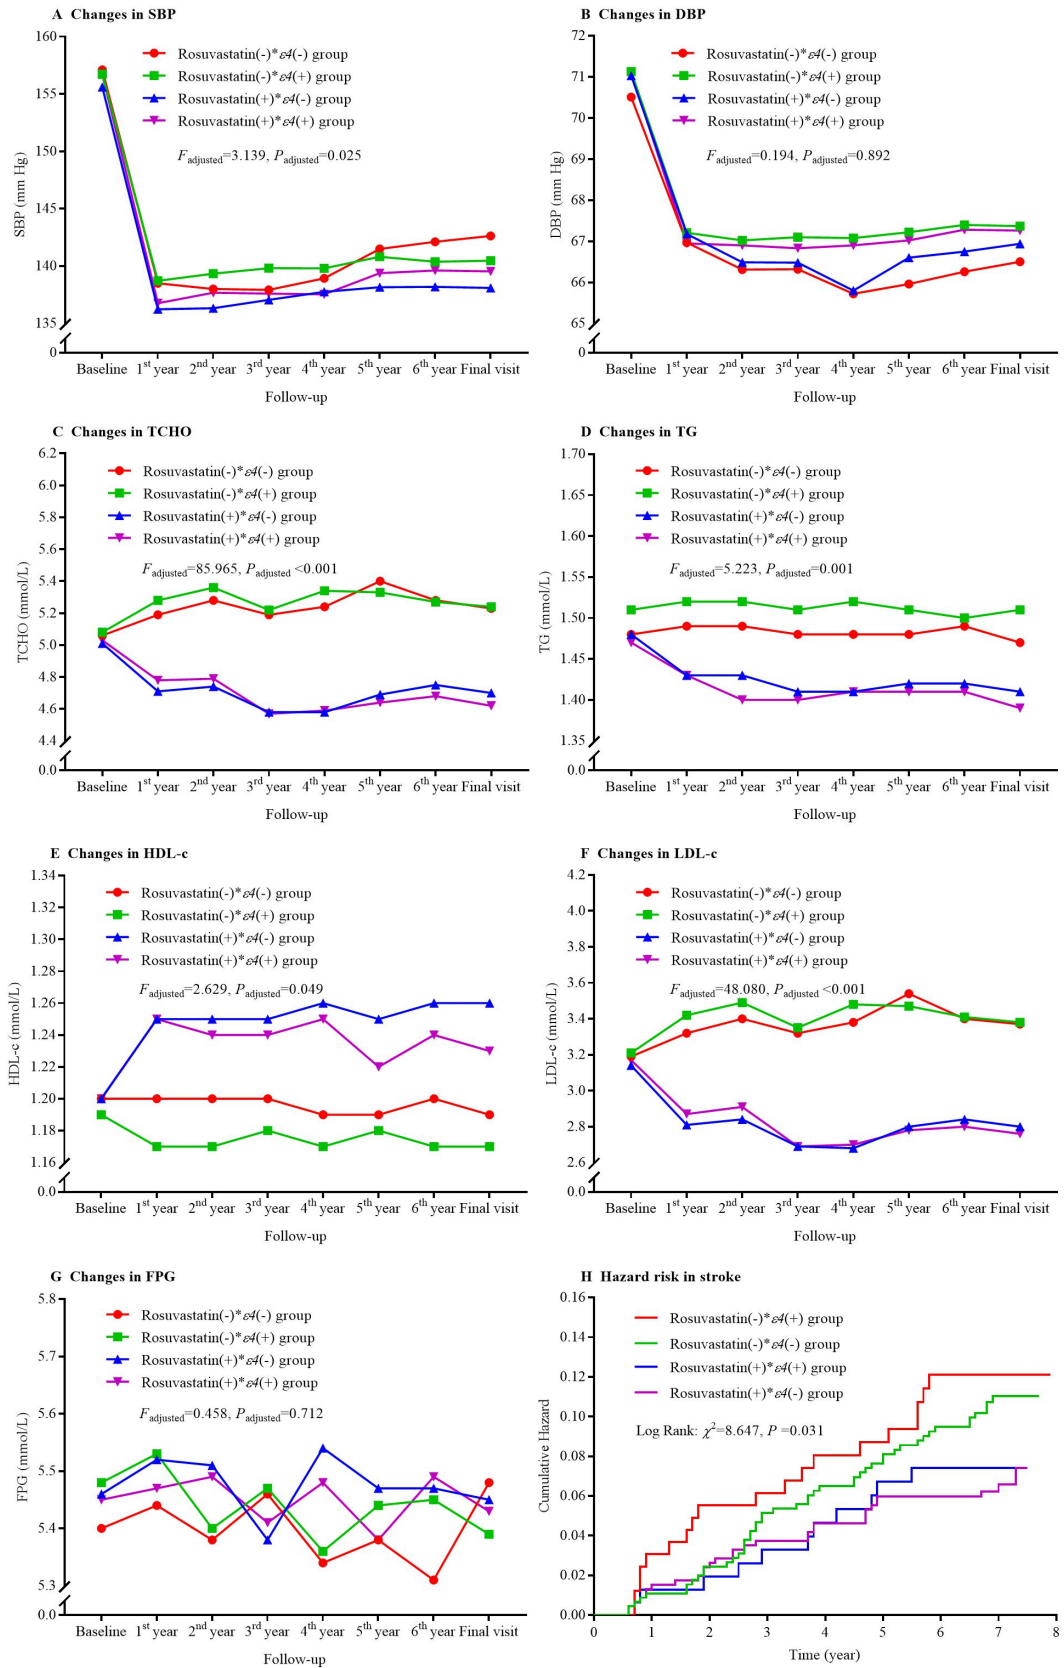

**Supplementary Fig. 7 Trajectory of blood pressure, lipids, and fasting plasma glucose and cumulative hazards of stroke incidence during the follow-up period in the patients**

**grouped by rosuvastatin administration and *APOE* genotype.** A is the trajectory of SBP; B is the trajectory of DBP; C is the trajectory of TCHO; D is the trajectory of TG; E is the trajectory of HDL-c; F is the trajectory of LDL-c; G is the trajectory of FPG; H is the cumulative hazard of stroke incidence. SBP indicates systolic blood pressure; DBP, diastolic blood pressure; TCHO, total cholesterol; TG, triglycerides; HDL-c, high-density lipoprotein cholesterol; LDL-c, low-density lipoprotein cholesterol; FPG, fasting plasma glucose.

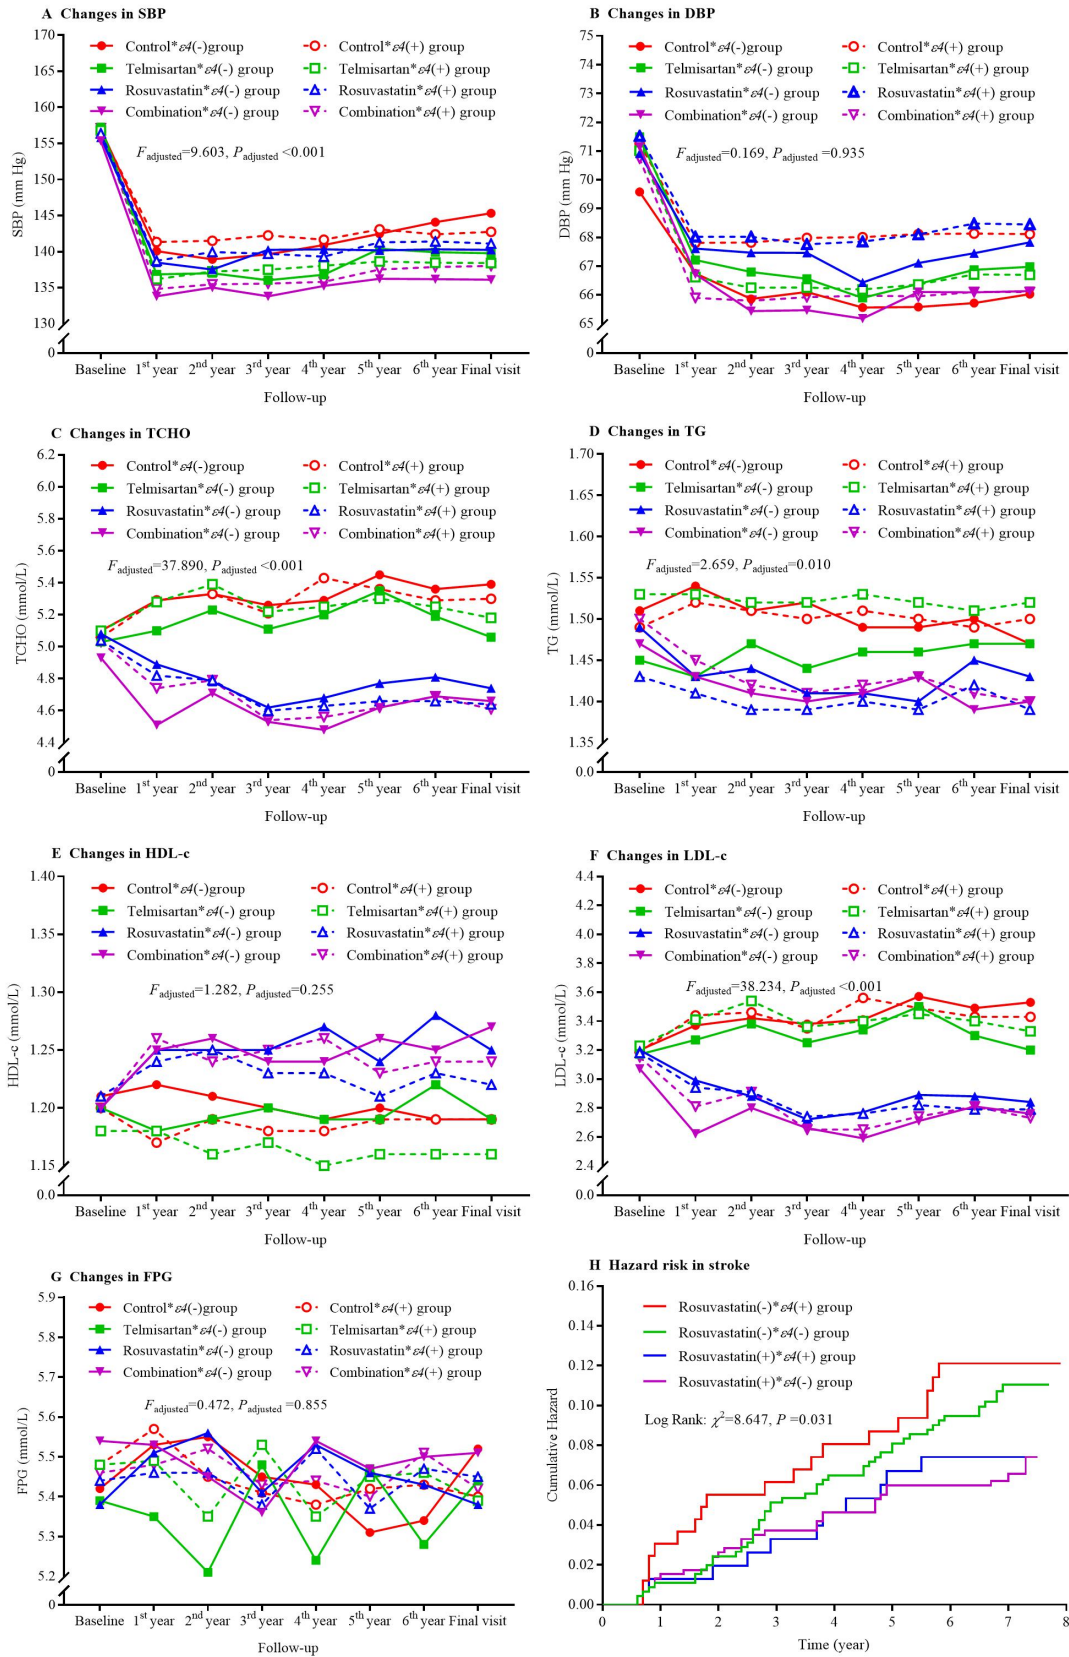

**Supplementary Fig. 8 Trajectory of blood pressure, lipids, and fasting plasma glucose and cumulative hazards of stroke incidence during the follow-up period in the patients**

**grouped by telmisartan, rosuvastatin, and *APOE* genotype.** A is the trajectory of SBP; B is the trajectory of DBP; C is the trajectory of TCHO; D is the trajectory of TG; E is the trajectory of HDL-c; F is the trajectory of LDL-c; G is the trajectory of FPG; H is the cumulative hazard of stroke incidence. SBP indicates systolic blood pressure; DBP, diastolic blood pressure; TCHO, total cholesterol; TG, triglycerides; HDL-c, high-density lipoprotein cholesterol; LDL-c, low-density lipoprotein cholesterol; FPG, fasting plasma glucose.
